# Supplementary material for: Chlorosulfonic acid coated on porous organic polymer as a bifunctional catalyst for the one-pot three-component synthesis of 1,8-naphthyridines
Source: Royal Society of Chemistry journal article supplement (doi:10.1039/d2ra05070f), 2022-01-01

**Chlorosulfonic acid coated on porous organic polymer as a bifunctional catalyst  
for one-pot three-component synthesis of 1,8-naphthyridines**

**Supporting Information**

Ramin Ghiai, Sedigheh Alavinia, Ramin Ghorbani-Vaghei\*

Department of Organic Chemistry, Faculty of Chemistry, Bu-Ali Sina University, Hamedan, 6517838683,  
Iran

\*Corresponding author; E-mail: [rgvaghei@yahoo.com](mailto:rgvaghei@yahoo.com); Tel: +98(81)38380647

## Spectral data for products.

### 2-Amino-4-phenyl-1,8-naphthyridine-3-carbonitrile

$^1\text{H}$  NMR (300 MHz,  $\text{DMSO-}d_6$ )  $\delta$  8.52 (d,  $J = 7.9$  Hz, 1H), 8.35 (s, 1H), 8.10–7.88 (m, 3H), 7.65 (d,  $J = 9.1$  Hz, 1H), 7.58 (dd,  $J = 8.5, 6.5$  Hz, 2H), 7.38–7.32 (m, 1H), 7.15 (ddd,  $J = 9.1, 6.5, 2.5$  Hz, 1H), 6.80 (d,  $J = 6.8, 1.5$  Hz, 1H).  $^{13}\text{C}$  NMR (75 MHz,  $\text{DMSO-}d_6$ )  $\delta$  145.49, 144.21, 134.38, 133.91, 129.17, 128.16, 127.28, 126.01, 125.40, 116.98, 112.53, 109.74, 87.14.

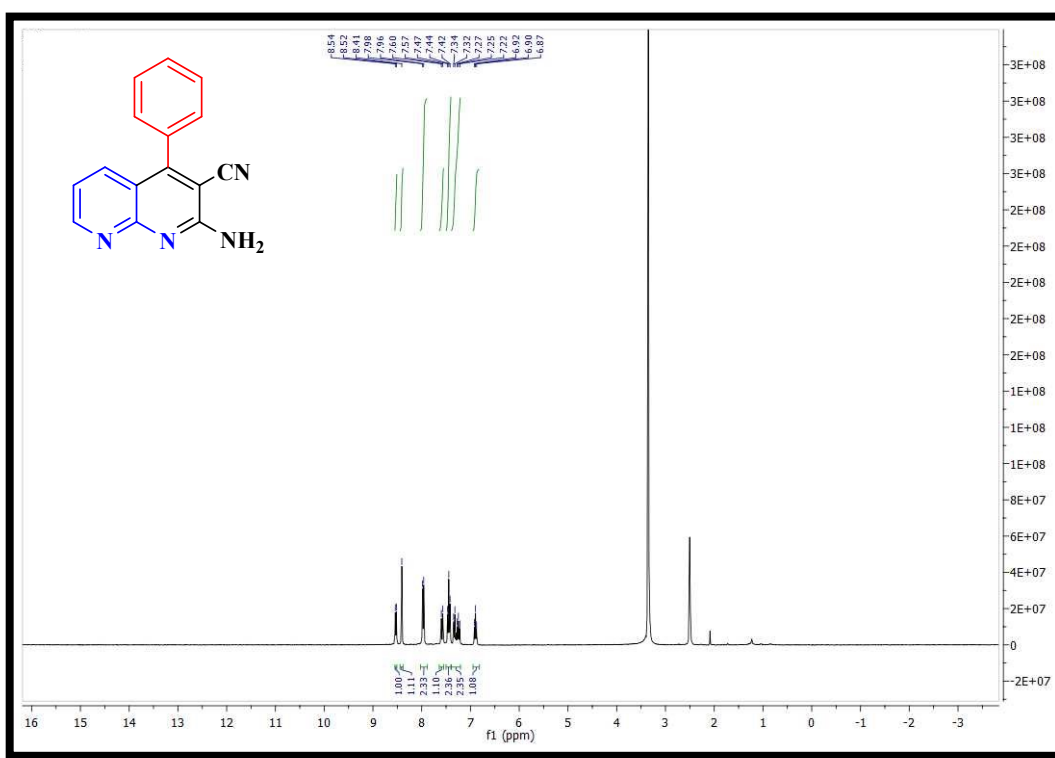

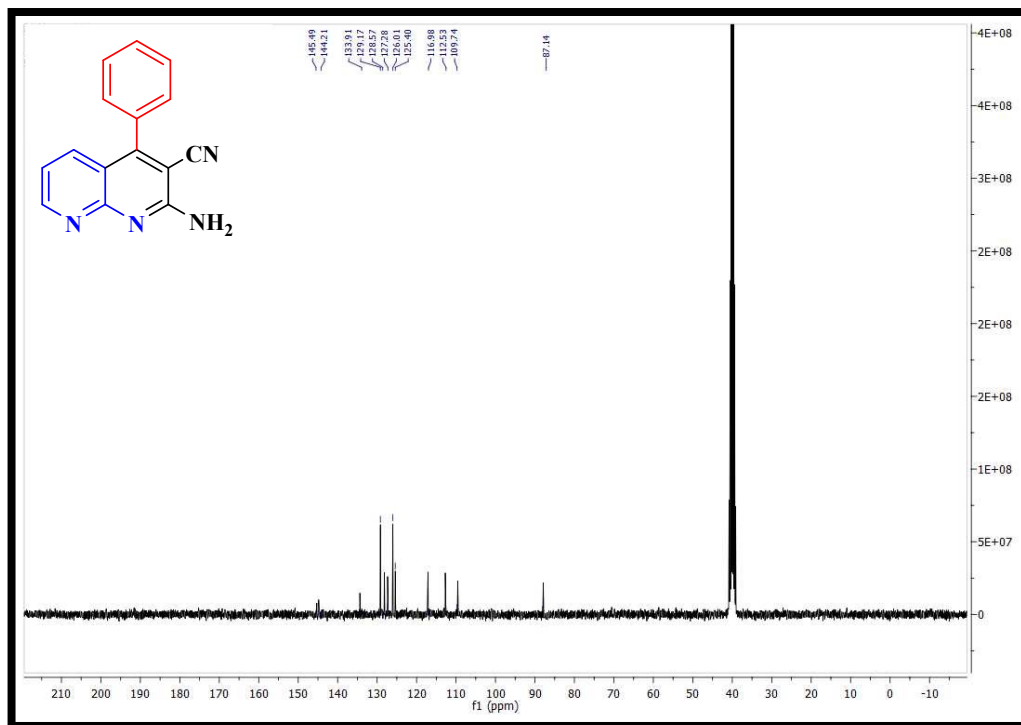

***2-Amino-4-(4-nitrophenyl)-1,8-naphthyridine-3-carbonitrile***

$^1\text{H}$  NMR (500 MHz, DMSO- $\text{d}_6$ )  $\delta$  8.88 (s, 2H), 8.82 (d,  $J = 8.8$  Hz, 2H), 8.51 (d,  $J = 8.6$  Hz, 2H), 8.19 (d,  $J = 8.2$  Hz, 2H), 7.88 (d,  $J = 8.2$  Hz, 1H), 7.80 (d,  $J = 8.5$  Hz, 1H), 7.37 (d,  $J = 7.9$  Hz, 1H).

$^{13}\text{C}$  NMR (126 MHz, DMSO- $\text{d}_6$ )  $\delta$  158.58, 156.60, 148.02, 142.43, 136.29, 135.40, 132.33, 128.70, 127.37, 124.77, 116.88, 114.15, 113.96, 112.94, 87.33.

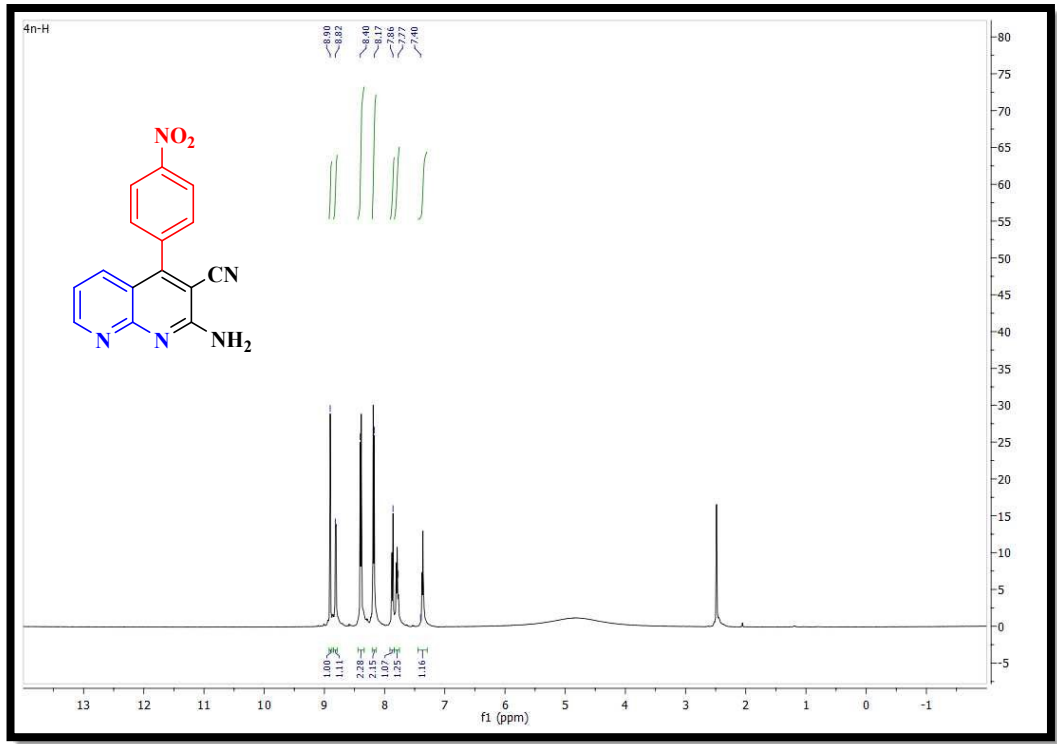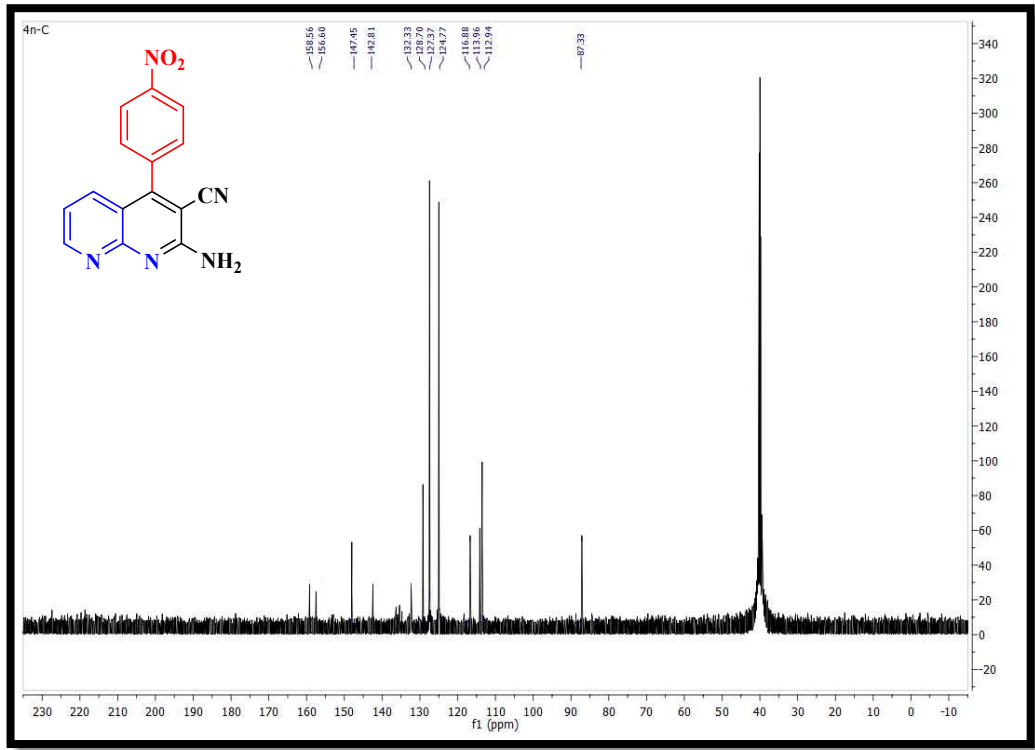

**2-Amino-4-(2-chlorophenyl)-1,8-naphthyridine-3-carbonitrile**

$^1\text{H}$  NMR (500 MHz,  $\text{DMSO-d}_6$ )  $\delta$  8.52 (d,  $J = 7.7$  Hz, 1H), 8.49 (s, 1H), 8.00 (t,  $J = 2.9$  Hz, 1H), 7.95–7.89 (m, 1H), 7.58 (d,  $J = 8.5$  Hz, 1H), 7.46 (t,  $J = 8.8$  Hz, 1H), 7.36 (dd,  $J = 8.9, 2.5$  Hz, 1H), 7.31–7.22 (m, 1H), 6.90 (t,  $J = 6.7$  Hz, 1H).  $^{13}\text{C}$  NMR (126 MHz,  $\text{DMSO-d}_6$ )  $\delta$  159.59, 144.77, 143.13, 136.26, 128.08, 127.05, 126.42, 125.77, 124.13, 117.51, 112.62, 110.66, 87.33.

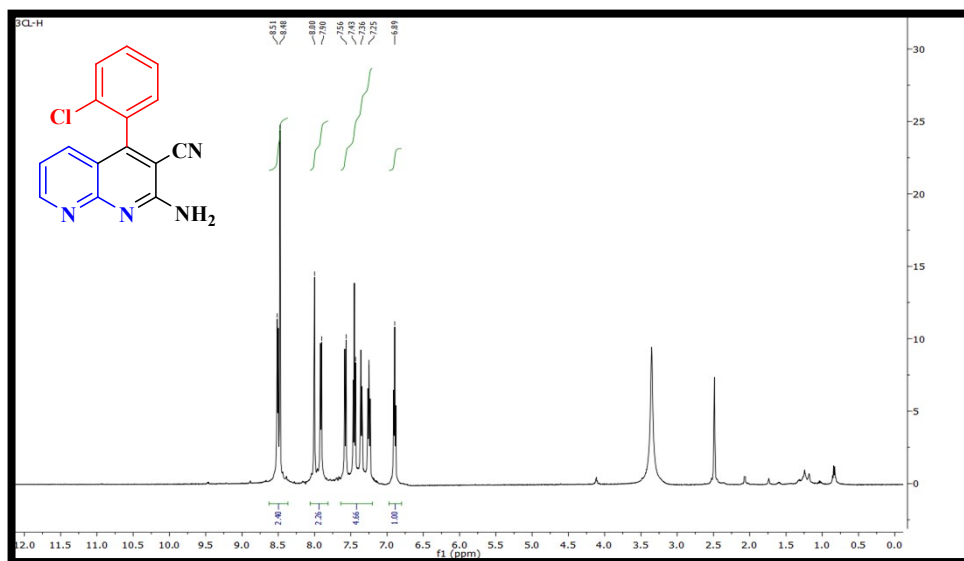

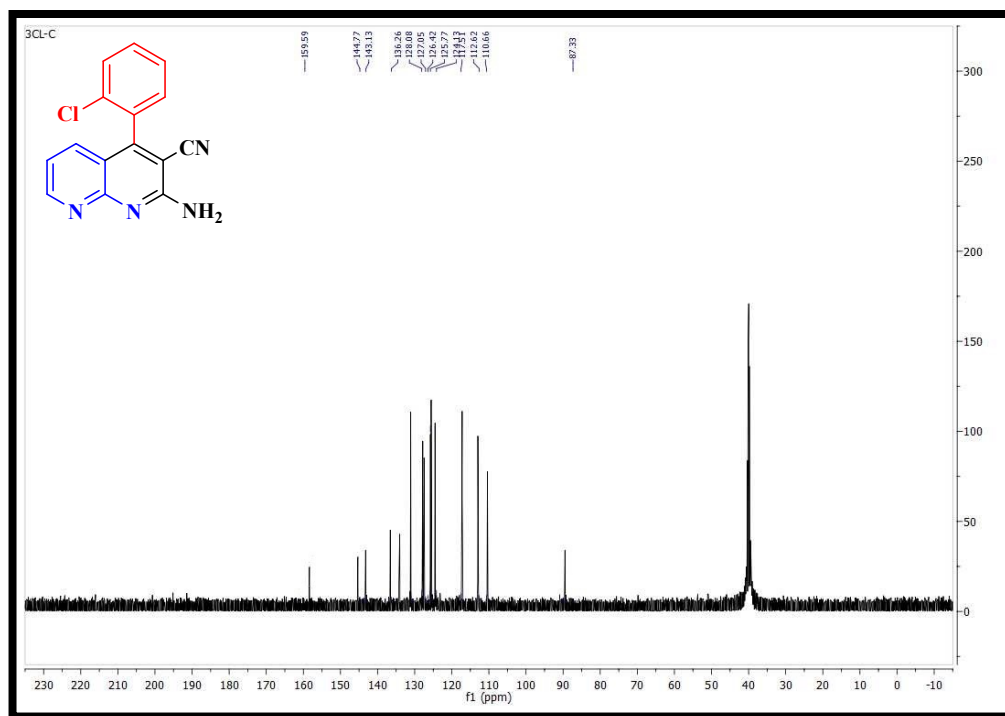

***2-Amino-4-(4-bromoophenyl)-1,8-naphthyridine-3-carbonitrile***

$^1\text{H}$  NMR (500 MHz, DMSO- $d_6$ )  $\delta$  8.88 (d,  $J = 7.8$  Hz, 1H), 8.85 (s, 2H), 7.93 (d,  $J = 6.5$  Hz, 1H), 7.84 (d,  $J = 8.5$  Hz, 2H), 7.79 (d,  $J = 8.5$  Hz, 2H), 7.50 (d,  $J = 6.5, 3.5$  Hz, 1H).  $^{13}\text{C}$  NMR (126 MHz, DMSO- $d_6$ )  $\delta$  157.31, 154.63, 140.72, 134.89, 134.09, 133.93, 129.43, 128.46, 126.34, 124.18, 117.72, 112.69, 112.18, 109.99, 85.68.

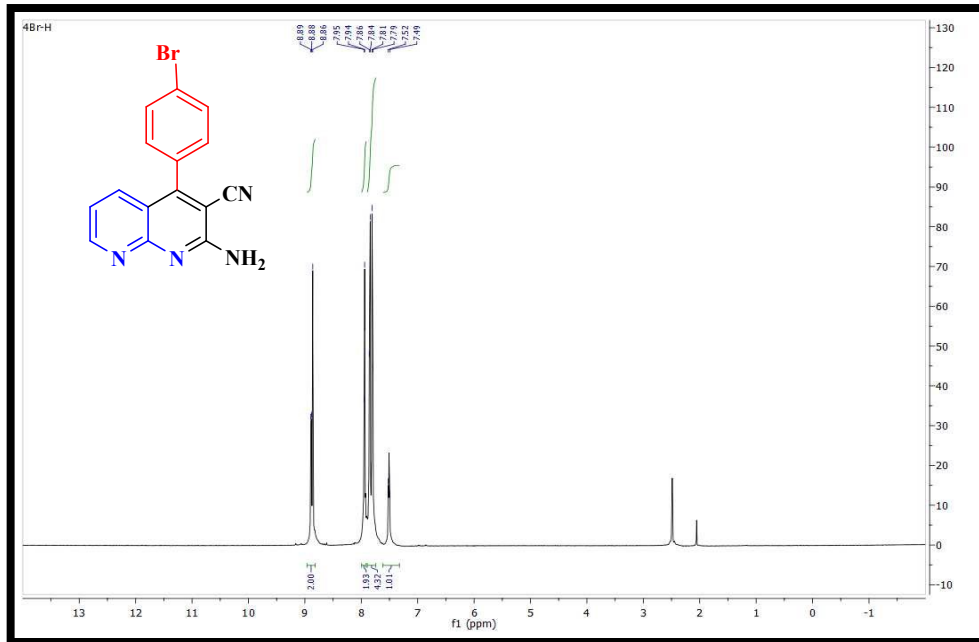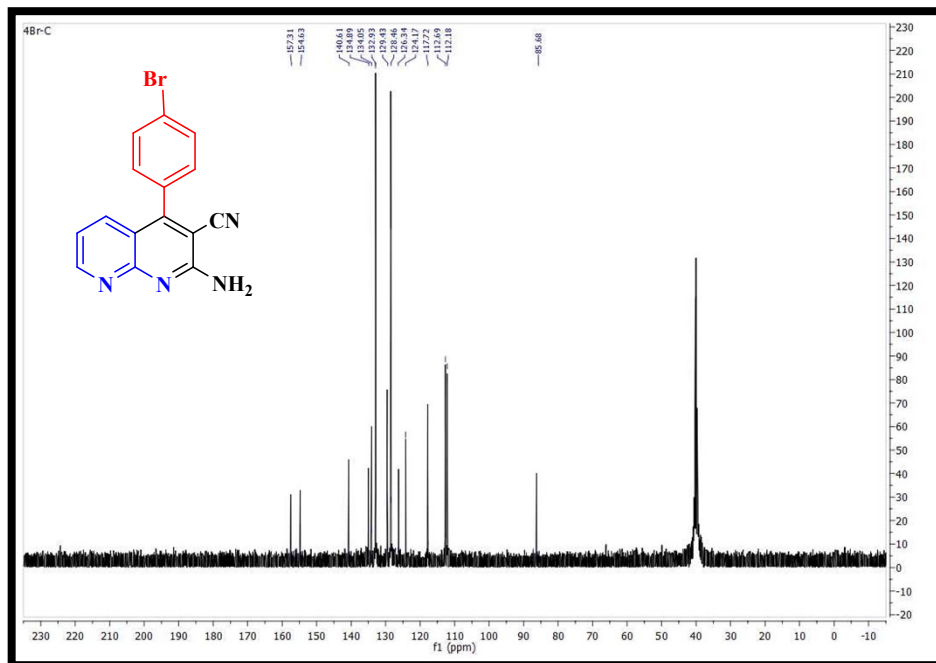

**2-Amino-4-(4-chlorophenyl)-1,8-naphthyridine-3-carbonitrile**

$^1\text{H}$  NMR (500 MHz, DMSO- $d_6$ )  $\delta$  8.52 (d,  $J$  = 6.8 Hz, 1H), 8.34 (s, 2H), 7.98–7.95 (m, 1H), 7.64 (d,  $J$  = 9.3 Hz, 1H), 7.55–7.48 (m, 1H), 7.34–7.22 (m, 1H), 6.91 (t,  $J$  = 7.8 Hz, 1H).  $^{13}\text{C}$  NMR (126 MHz, DMSO- $d_6$ )  $\delta$  157.94, 154.63, 144.78, 142.81, 132.96, 129.33, 127.71, 125.79, 124.45, 116.88, 112.64, 110.03, 87.64.

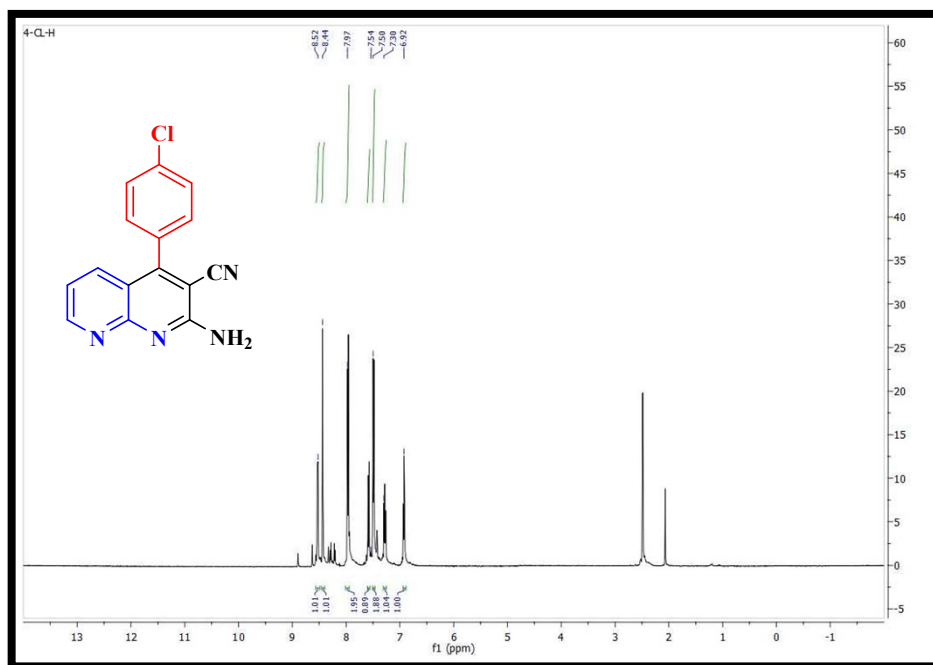



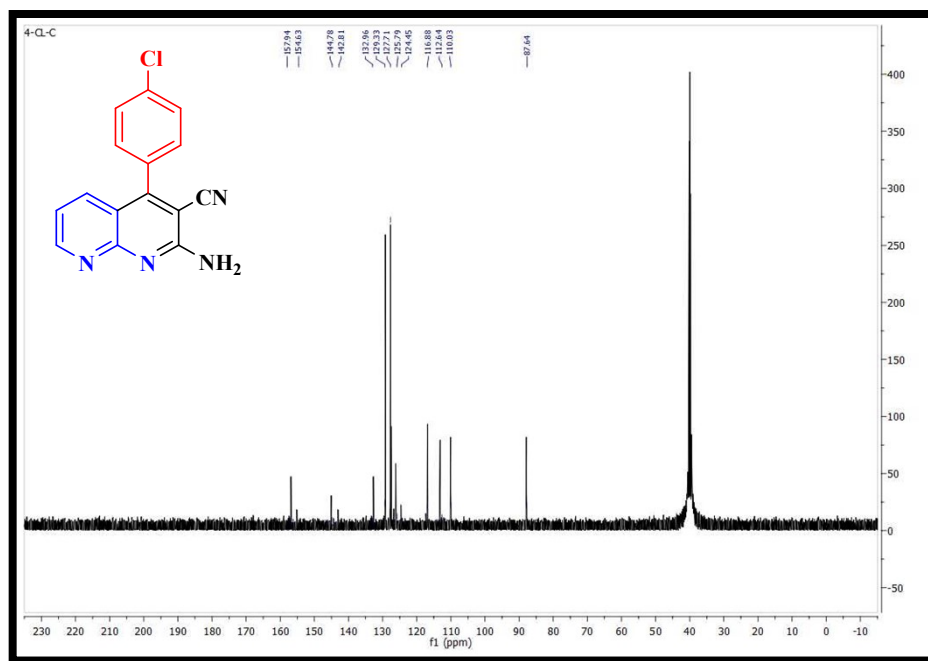

***2-Amino-4-(3-nitrophenyl)-1,8-naphthyridine-3-carbonitrile***

$^1\text{H}$  NMR (500 MHz,  $\text{DMSO-d}_6$ )  $\delta$  8.79 – 8.74 (m, 1H), 8.62 (s, 1H), 8.56 (d,  $J = 6.8$  Hz, 1H), 8.39 (d,  $J = 7.5$  Hz, 1H), 8.15 (ddd,  $J = 8.5, 2.5, 1.5$  Hz, 1H), 7.74 (t,  $J = 8.0$  Hz, 1H), 7.65–7.59 (m, 1H), 7.30 (ddd,  $J = 9.2, 7.7, 2.5$  Hz, 1H), 6.94 (d,  $J = 6.8$  Hz, 1H).  $^{13}\text{C}$  NMR (126 MHz,  $\text{DMSO-d}_6$ )  $\delta$  158.26, 153.37, 148.85, 145.47, 142.43, 136.19, 132.64, 130.99, 127.05, 126.41, 122.78, 119.88, 117.50, 113.26, 110.99, 84.02.

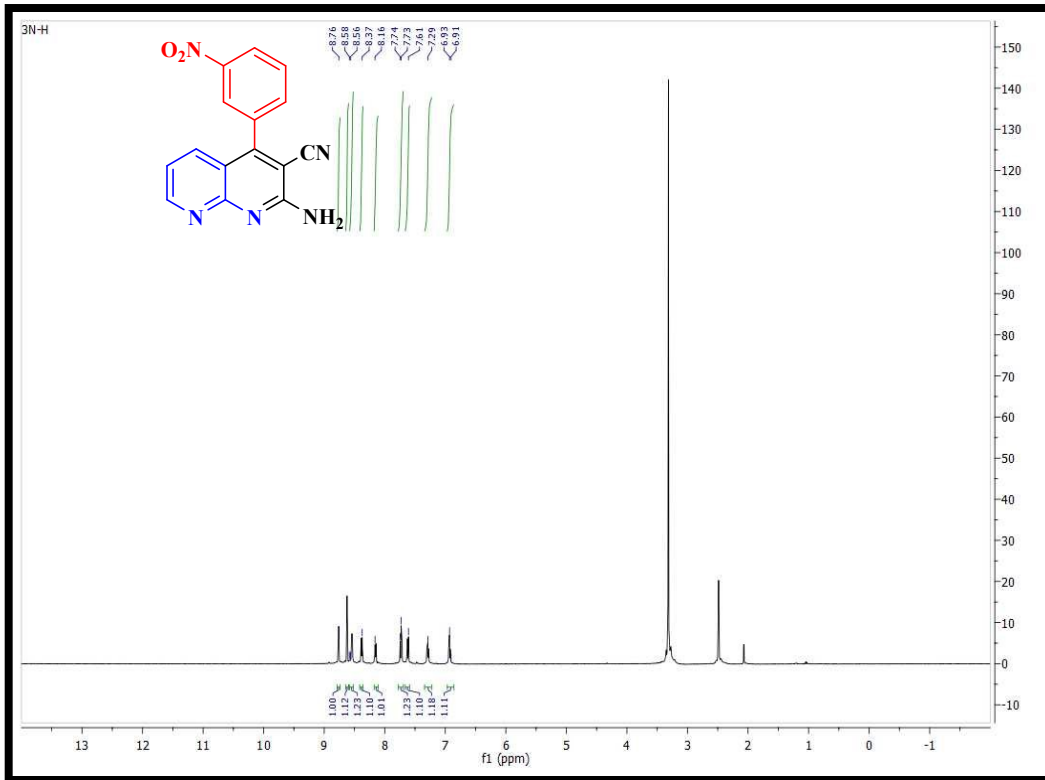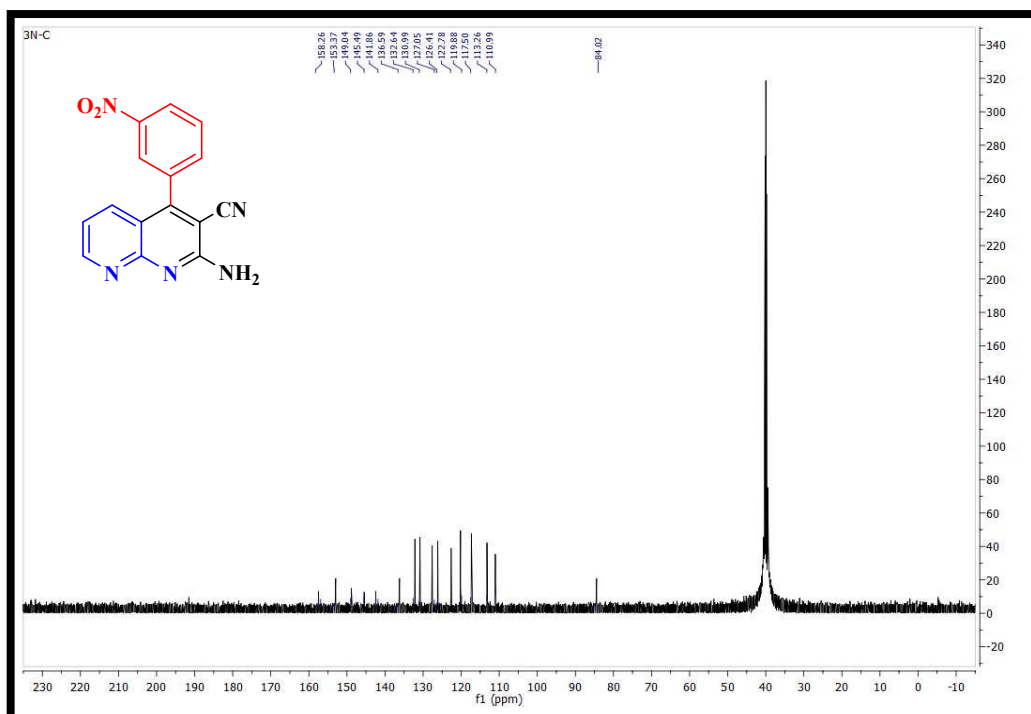

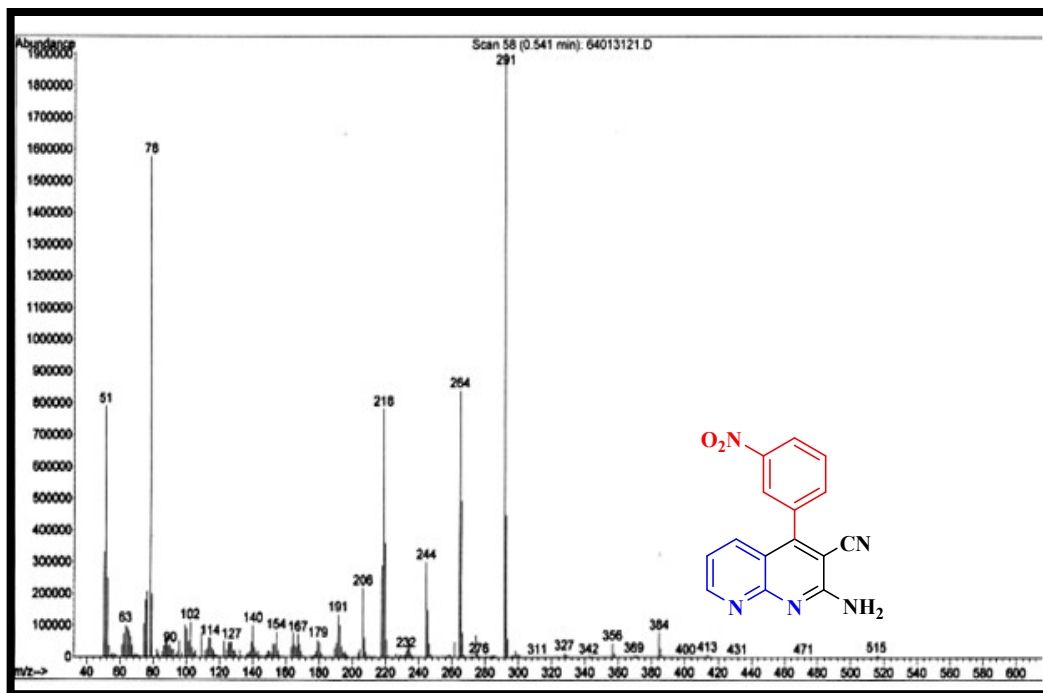

***2-Amino-4-(4-methoxyphenyl)-1,8-naphthyridine-3-carbonitrile***

$^1\text{H}$  NMR (300 MHz, DMSO- $d_6$ )  $\delta$  8.78 (d,  $J = 7.7$  Hz, 1H), 8.75 – 8.55 (m, 4H), 7.99–7.70 (m, 6H), 7.60 (d,  $J = 7.5, 4.6$  Hz, 1H), 7.29 (d,  $J = 8.4$  Hz, 3H), 3.85 (s, 3H).  $^{13}\text{C}$  NMR (75 MHz, DMSO- $d_6$ )  $\delta$  159.32, 148.50, 138.20, 135.45, 128.37, 128.26, 120.30, 117.73, 115.16, 112.51, 110.95, 80.12, 56.98.

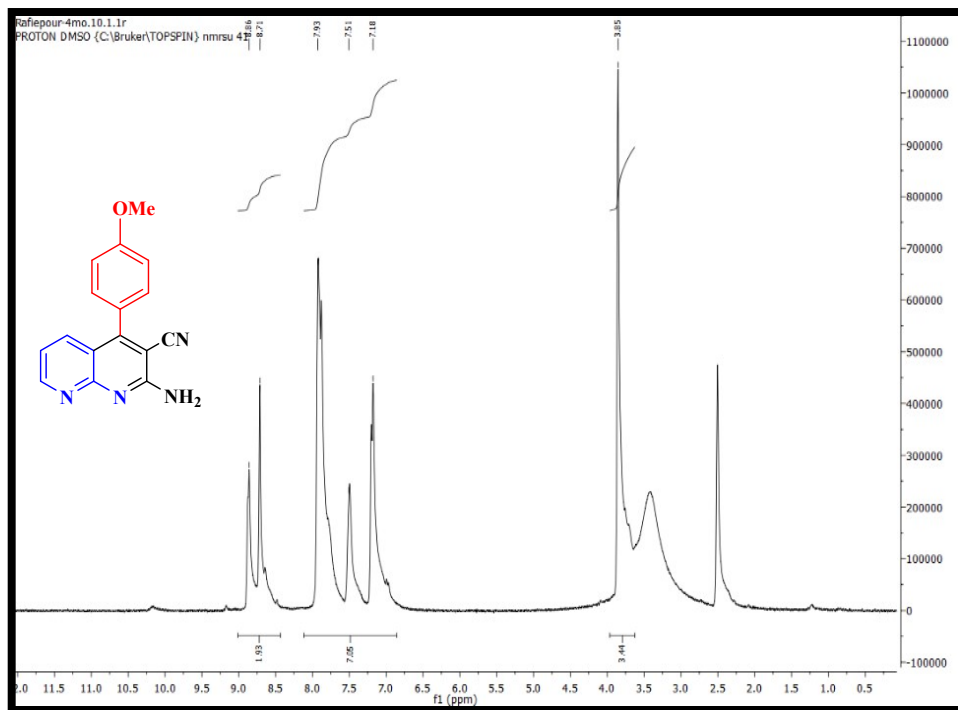

***2-Amino-4-(4-hydroxyphenyl)-1,8-naphthyridine-3-carbonitrile***

$^1\text{H}$  NMR (500 MHz, DMSO- $d_6$ )  $\delta$  10.10 (s, 1H), 8.92 – 8.80 (m, 1H), 8.62 (s, 1H), 7.97–7.85 (t, 2H), 7.75–7.65 (m, 1H), 7.59 (d,  $J = 7.5, 2.5$  Hz, 1H), 6.88 – 6.93 (m, 1H).  $^{13}\text{C}$  NMR (126 MHz, DMSO- $d_6$ )  $\delta$  160.23, 139.90, 136.26, 133.28, 129.29, 128.70, 127.77, 117.73, 117.20, 111.99, 110.04, 86.39.

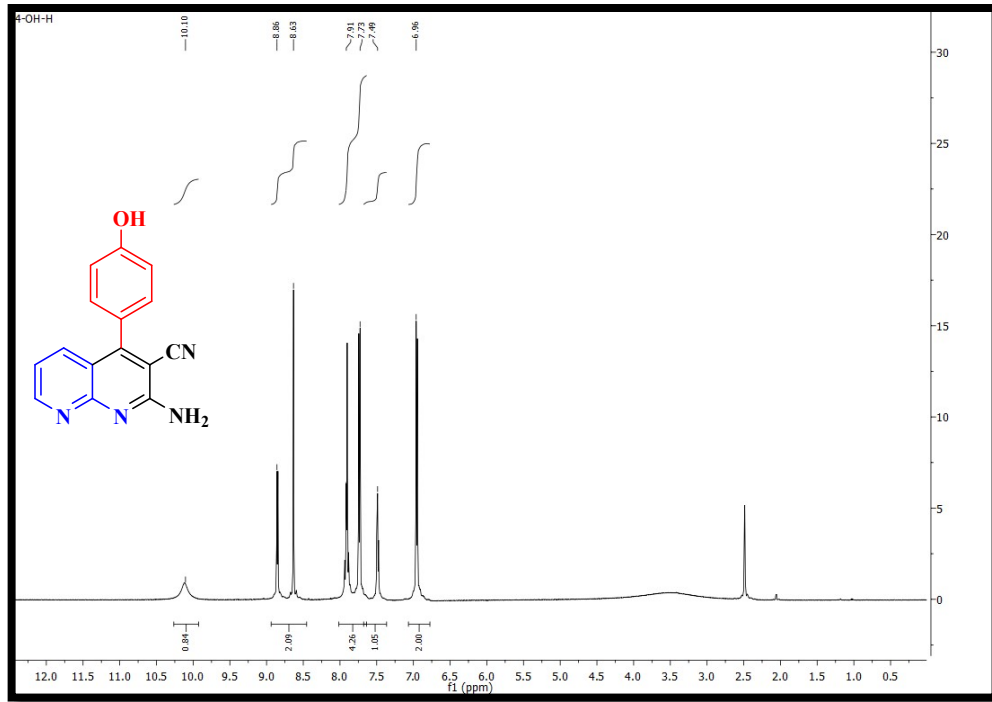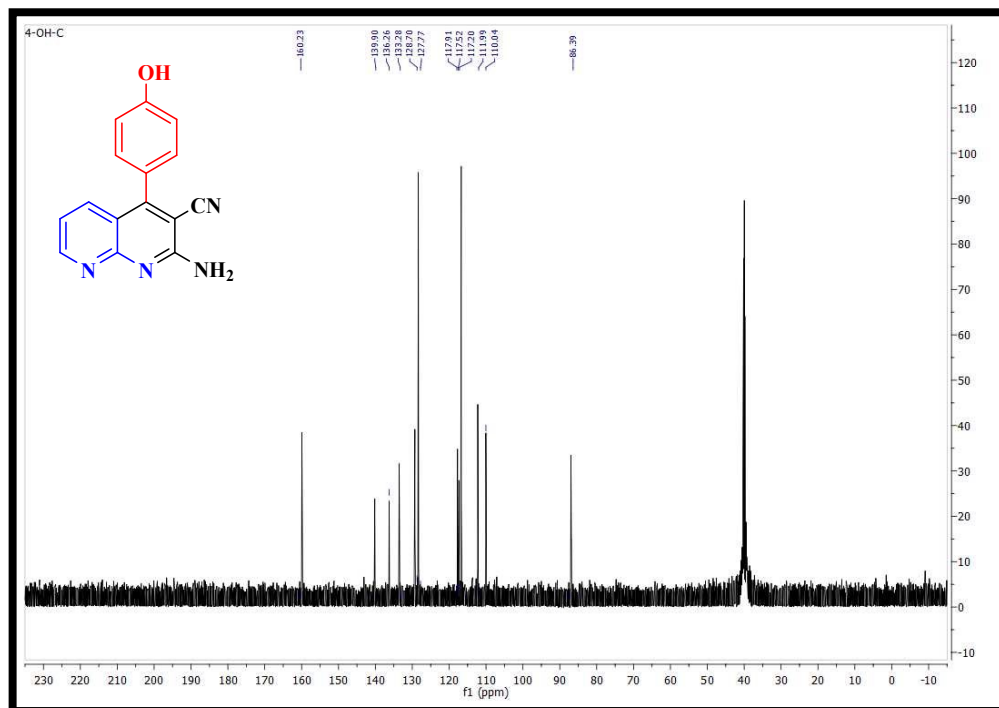

## 2-Amino-4-(*p*-tolyl)-1,8-naphthyridine-3-carbonitrile

$^1\text{H}$  NMR (500 MHz,  $\text{DMSO-}d_6$ )  $\delta$  8.88 – 8.80 (m, 1H), 7.96 (ddd,  $J = 9.3, 6.8, 2.5$  Hz, 2H), 7.77 (d,  $J = 9.5$  Hz, 2H), 7.76 – 7.65 (m, 2H), 7.57 (dd,  $J = 6.5, 2.7$  Hz, 1H), 2.07 (s, 3H).  $^{13}\text{C}$  NMR (126 MHz,  $\text{DMSO-}d_6$ )  $\delta$  151.71, 139.45, 135.20, 133.42, 130.84, 130.85, 129.90, 127.45, 126.52, 120.30, 117.32, 112.46, 83.39, 9.19.

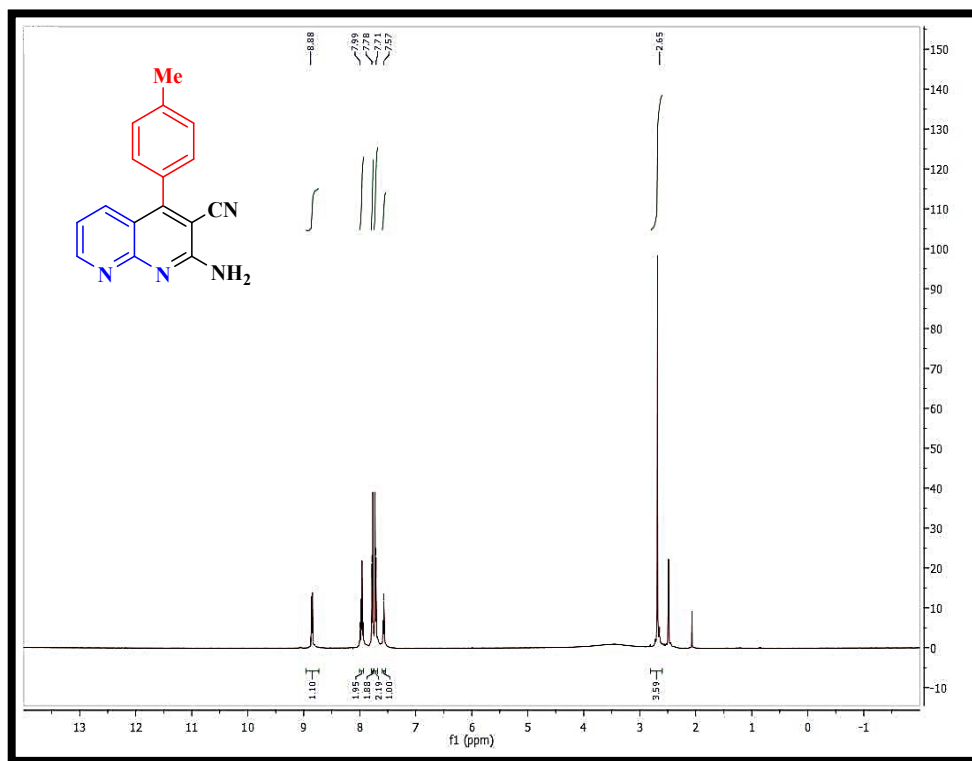

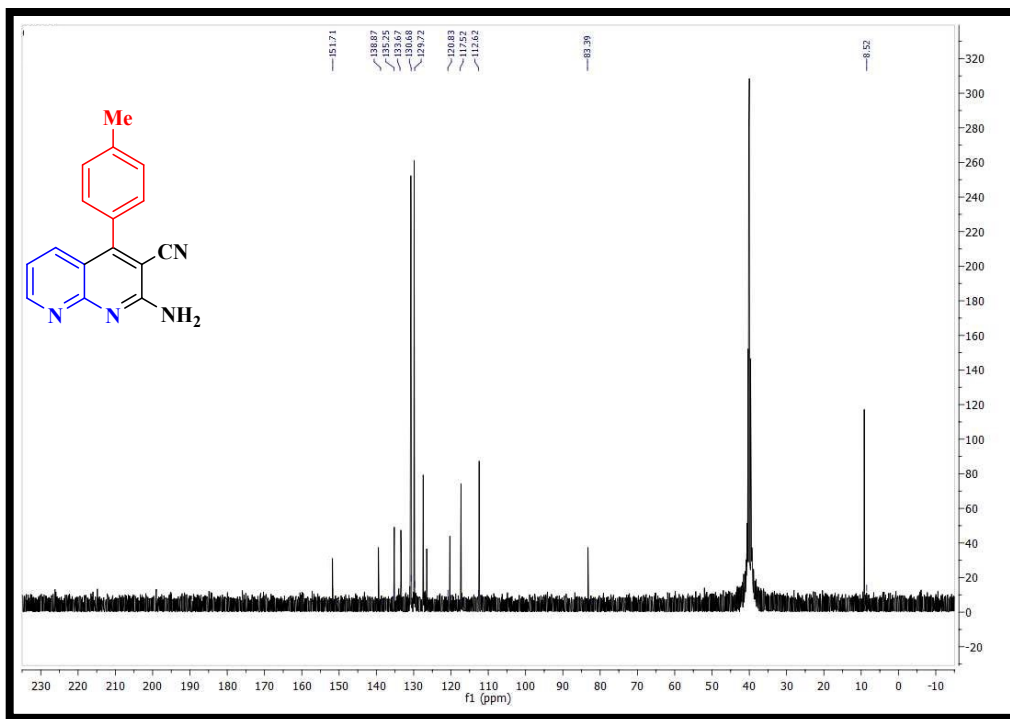

***2-Amino-4-(biphenyl)-1,8-naphthyridine-3-carbonitrile***

$^1\text{H}$  NMR (500 MHz, DMSO- $d_6$ )  $\delta$  8.64 (d,  $J = 7.9$  Hz, 1H), 8.50 (d,  $J = 4.9$  Hz, 2H), 8.12 (dd,  $J = 9.6, 2.6$  Hz, 1H), 7.97 (t,  $J = 9.2$  Hz, 2H), 7.83 (d,  $J = 7.5$  Hz, 1H), 7.58 (d,  $J = 9.3$  Hz, 1H), 7.51 (t,  $J = 15.0, 7.3, 3.9$  Hz, 3H), 7.24 (t,  $J = 6.9$  Hz, 1H), 6.80 (t,  $J = 7.8$  Hz, 1H).  $^{13}\text{C}$  NMR (126 MHz, DMSO- $d_6$ )  $\delta$  157.31, 154.61, 147.45, 133.67, 132.64, 131.71, 128.39, 126.42, 125.39, 124.45, 117.19, 116.89, 112.95, 110.34, 80.48.

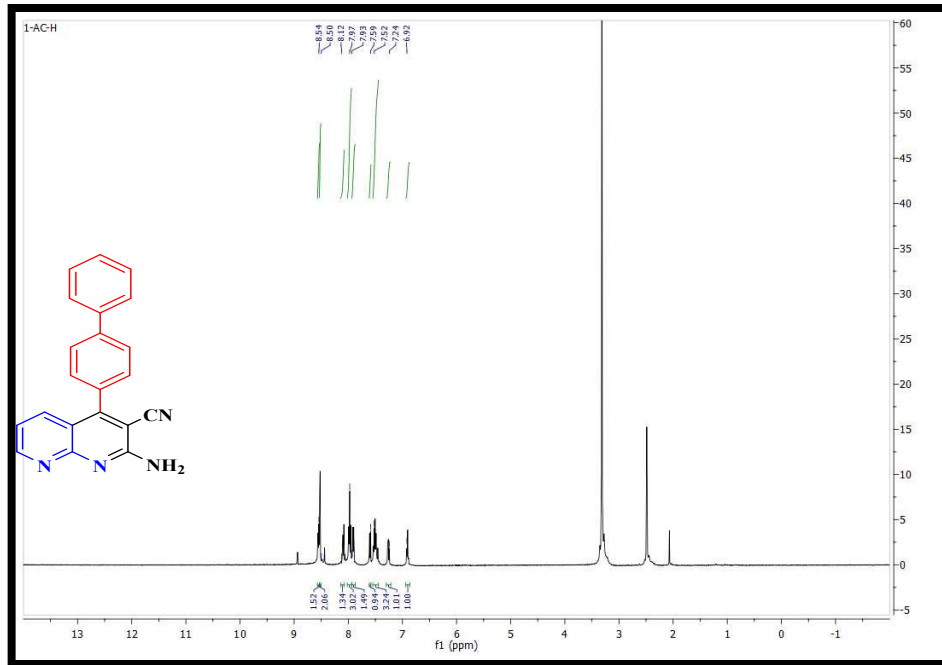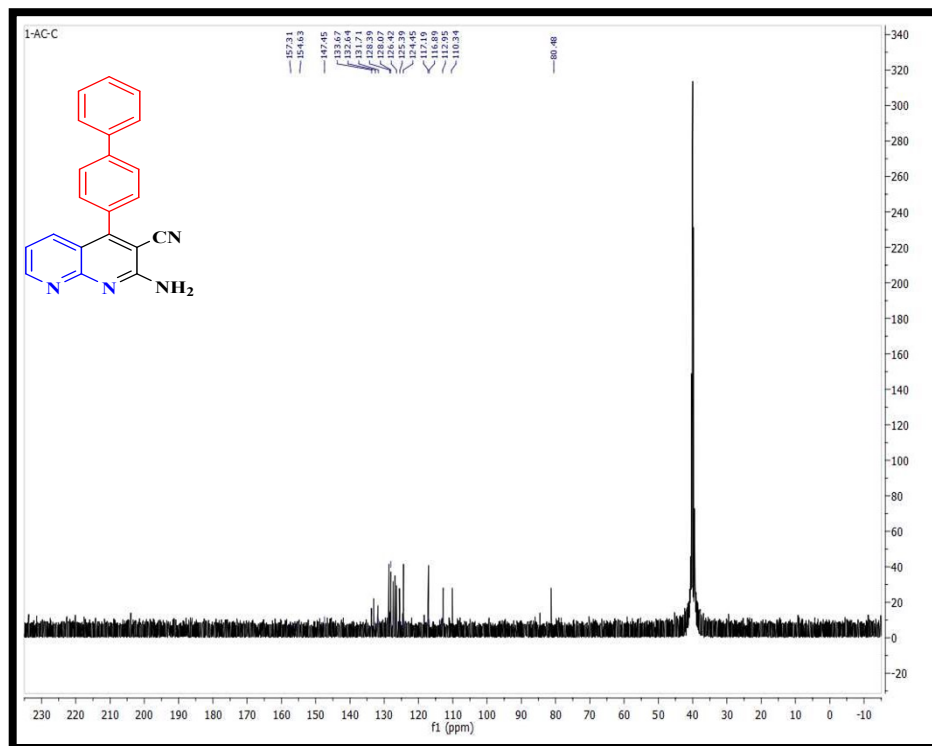



**2-Amino-4-(2-hydroxy-3-methoxyphenyl)-1,8-naphthyridine-3-carboxylate**:  $^1\text{H}$  NMR (400 MHz,  $\text{DMSO-d}_6$ ):  $\delta$  3.34 (s, 1H, OH), 3.67 (s, 3H,  $\text{OCH}_3$ ), 3.71 (s, 2H,  $\text{NH}_2$ ), 3.85 (s, 3H,  $\text{OCH}_3$ ), 6.56-6.59 (t,  $J = 4.8$  Hz, 1H, ArH), 6.94-6.96 (d,  $J = 7.2$  Hz, 1H, ArH), 7.05-7.18 (m, 3H, ArH), 7.92-7.94 (t,  $J = 3.2$  Hz, 1H, ArH);  $^{13}\text{C}$  NMR (100 MHz,  $\text{DMSO-d}_6$ ):  $\delta$  55.9, 56.1, 108.0, 111.8, 116.2, 117.6, 119.2, 120.1, 122.5, 123.0, 124.4, 137.0, 139.1, 147.6, 148.3, 149.0, 159.7, 164.5.

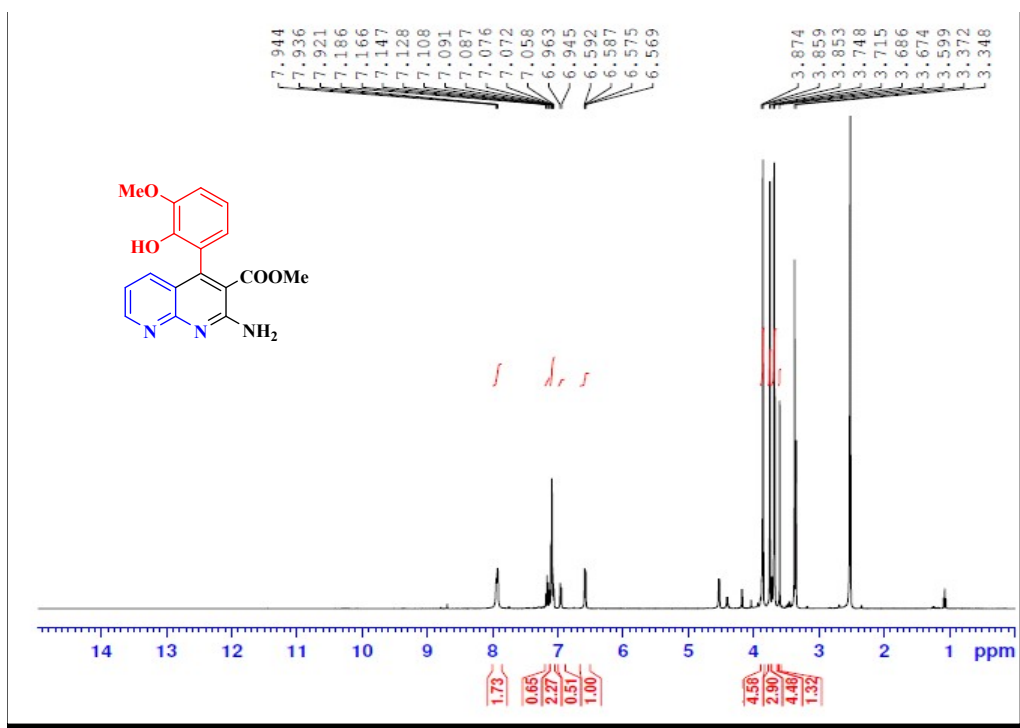

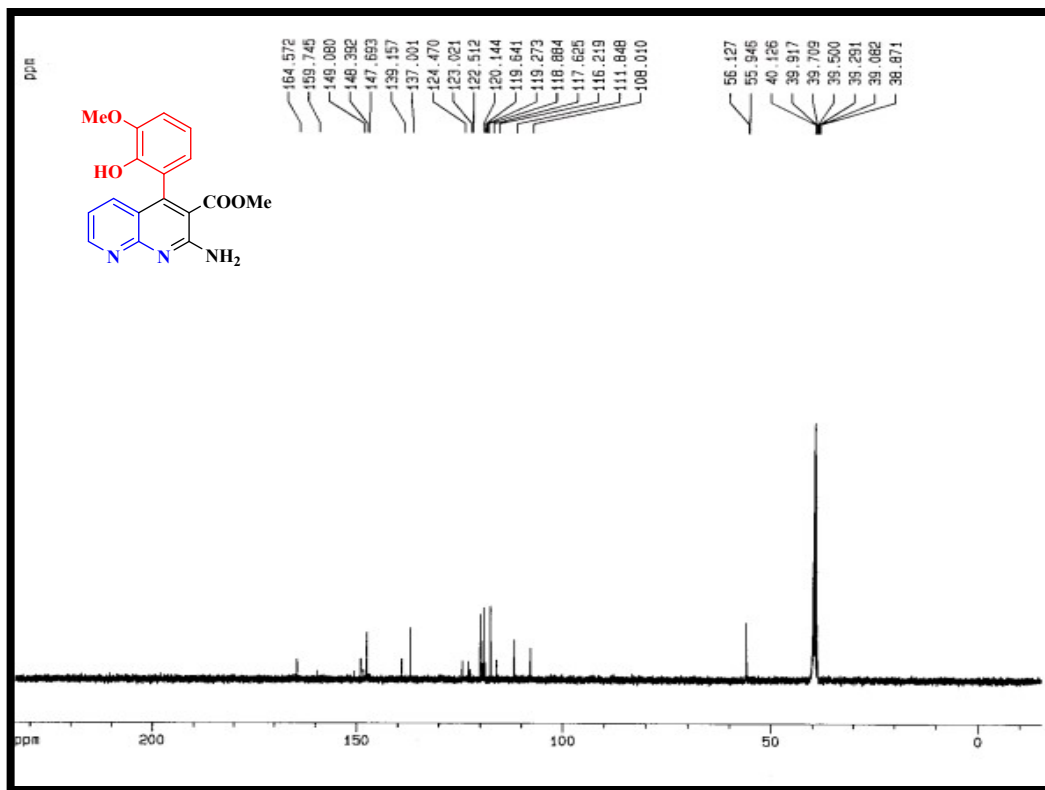

**2-Amino-6-bromo-4-(5-bromo-2-hydroxyphenyl)-1,8-naphthyridine-3-carbonitrile:** <sup>1</sup>H NMR (90 MHz, CDCl<sub>3</sub>): δ 6.86-7.49 (m, 5H, ArH, NH<sub>2</sub>), 8.52 (s, 1H, ArH), 9.32 (s, 1H, ArH), 13.21 (s, 1H, OH); <sup>13</sup>C NMR (100 MHz, CDCl<sub>3</sub>): δ<sub>c</sub>: 109.7, 118.3, 119.2, 120.8, 134.4, 135.6, 140.0, 149.1, 154.7, 159.8, 162.8.

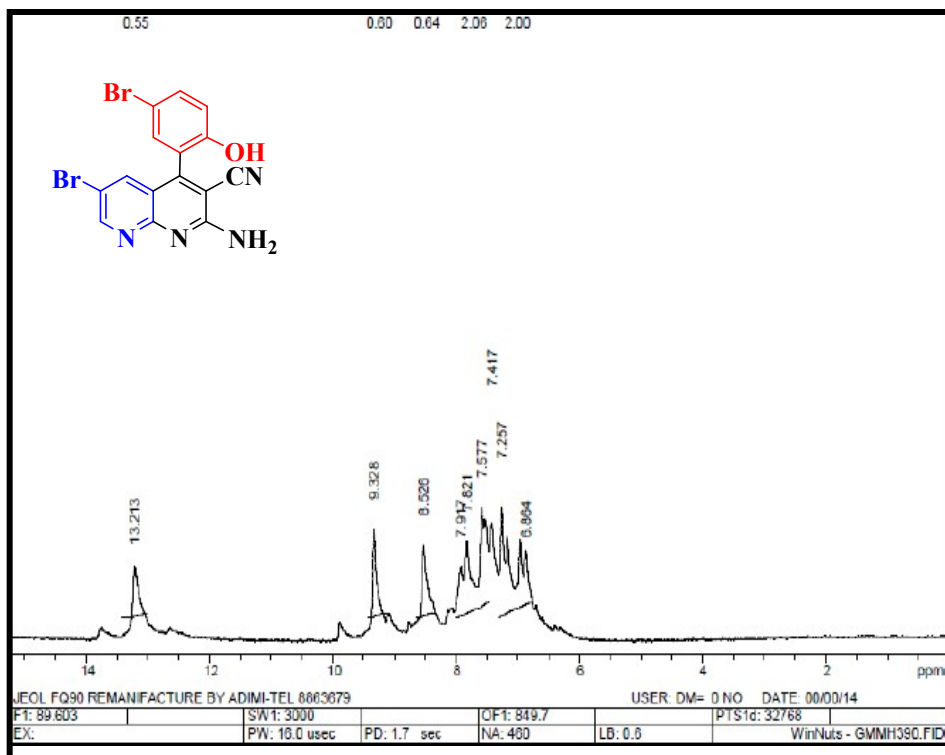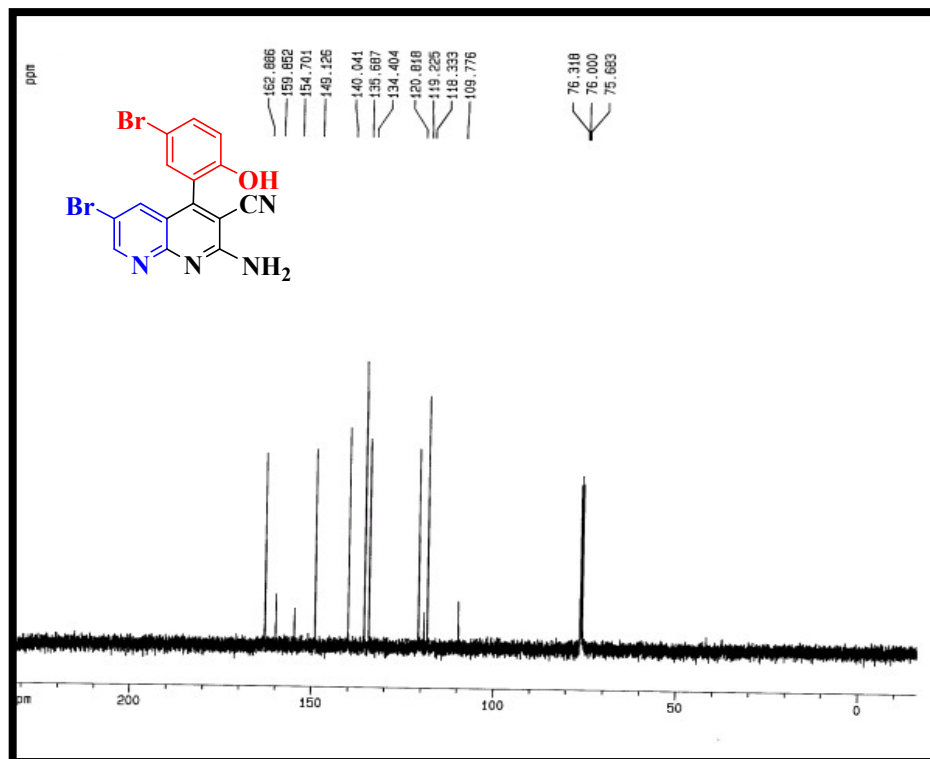

**2-Amino-4-(2-hydroxy-3-methoxyphenyl)-1,8-naphthyridine-3-carbonitrile:**  $^1\text{H}$  NMR (400 MHz,  $\text{CDCl}_3$ ):  $\delta$  3.90 (s, 3H,  $\text{OCH}_3$ ), 7.02-7.04 (d,  $J = 8.0$  Hz, 1H, ArH), 7.05-7.09 (t,  $J = 6.8$  Hz, 1H, ArH), 7.15-7.19 (t,  $J = 5.6$  Hz, 1H, ArH), 7.45-7.47 (d,  $J = 7.6$  Hz, 1H, ArH), 7.50 (br, 2H,  $\text{NH}_2$ ), 7.58-7.61 (d,  $J = 8.8$  Hz, 1H, ArH), 7.81-7.82 (t,  $J = 4.0$  Hz, 1H, ArH), 9.37 (d,  $J = 7.2$  Hz, 1H, ArH);  $^{13}\text{C}$  NMR (100 MHz,  $\text{CDCl}_3$ ):  $\delta$  54.5, 110.5, 115.1, 115.6, 119.8, 125.6, 128.0, 128.8, 130.7, 137.9, 150.4, 152.4, 159.1, 161.2, 183.8.

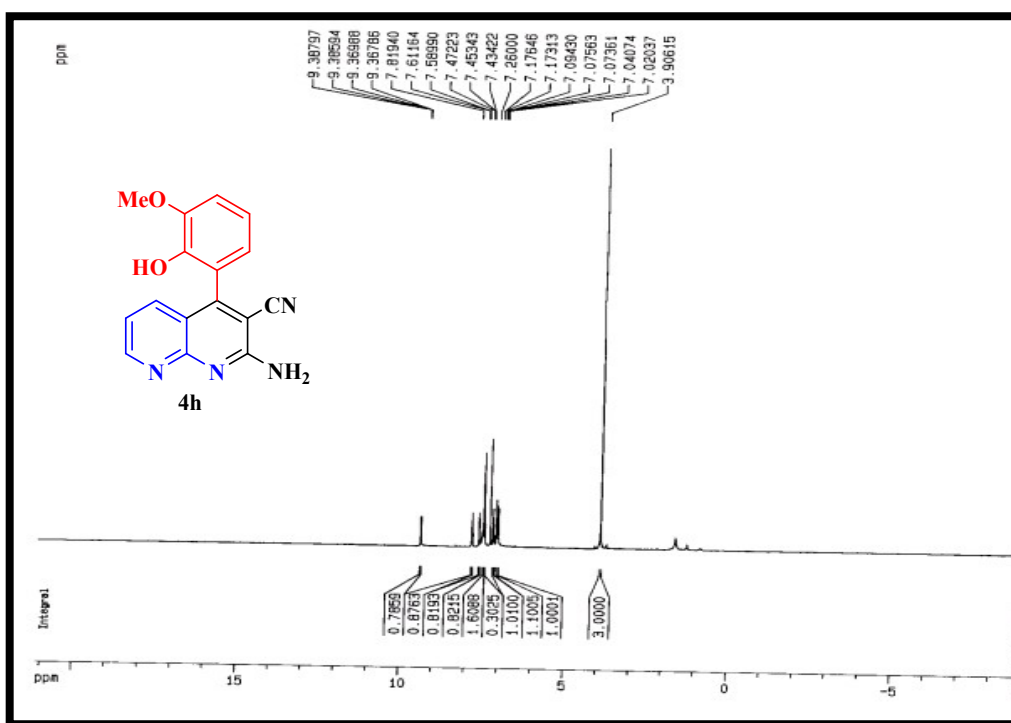

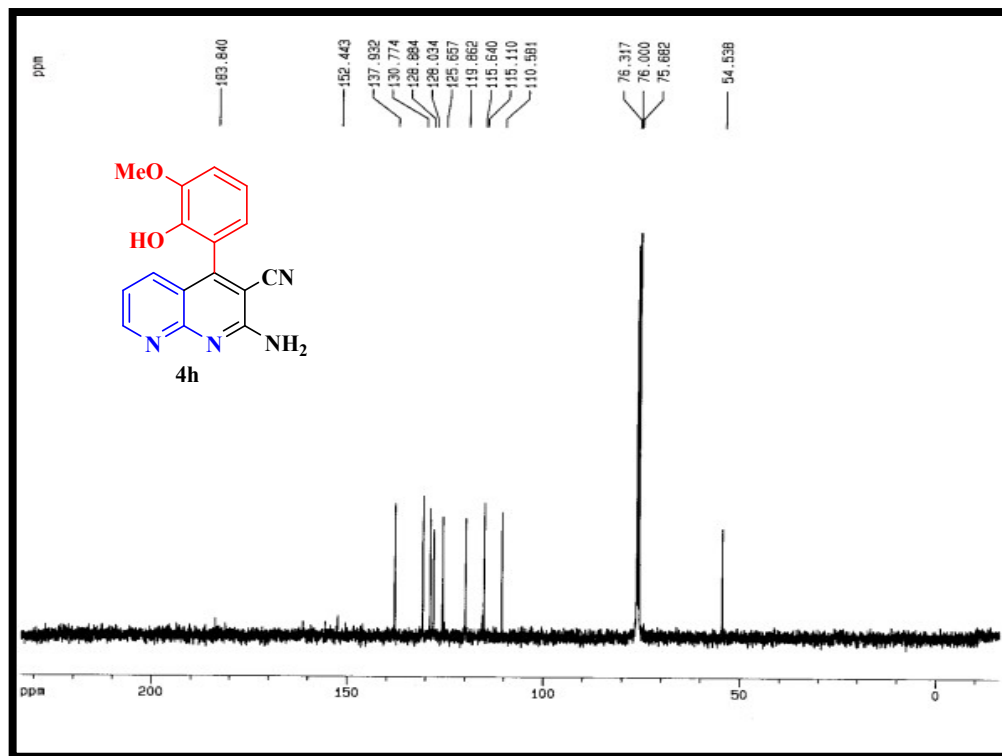

**2-Amino-4-(pyridin-2-yl)-1,8-naphthyridine-3-carbonitrile:** <sup>1</sup>H NMR (400 MHz, DMSO-d<sub>6</sub>): δ 7.65-7.68 (t, *J* = 6.8 Hz, 1H, ArH), 7.94-7.98 (t, 1H, *J* = 6.8 Hz, ArH), 8.03-8.07 (d, *J* = 10.0 Hz, 1H, ArH), 8.11-8.12 (d, 2H, NH<sub>2</sub>), 8.38-8.40 (d, *J* = 8.4 Hz, 1H, ArH), 8.85-8.86 (d, *J* = 4.4 Hz, 1H, ArH), 9.14-9.16 (d, *J* = 7.2 Hz, 1H, ArH); <sup>13</sup>C NMR (75 MHz, DMSO-d<sub>6</sub>): δ 108.0, 110.9, 113.3, 117.2, 118.4, 122.8, 124.4, 128.5, 129.7, 130.0, 137.3, 138.4, 142.7, 150.4, 152.8, 157.5.

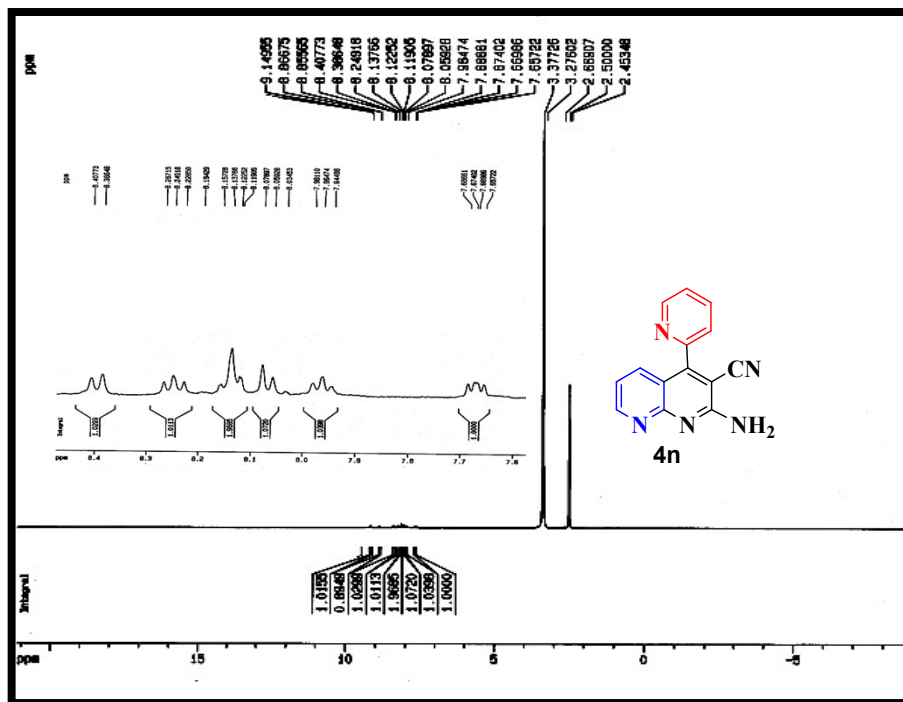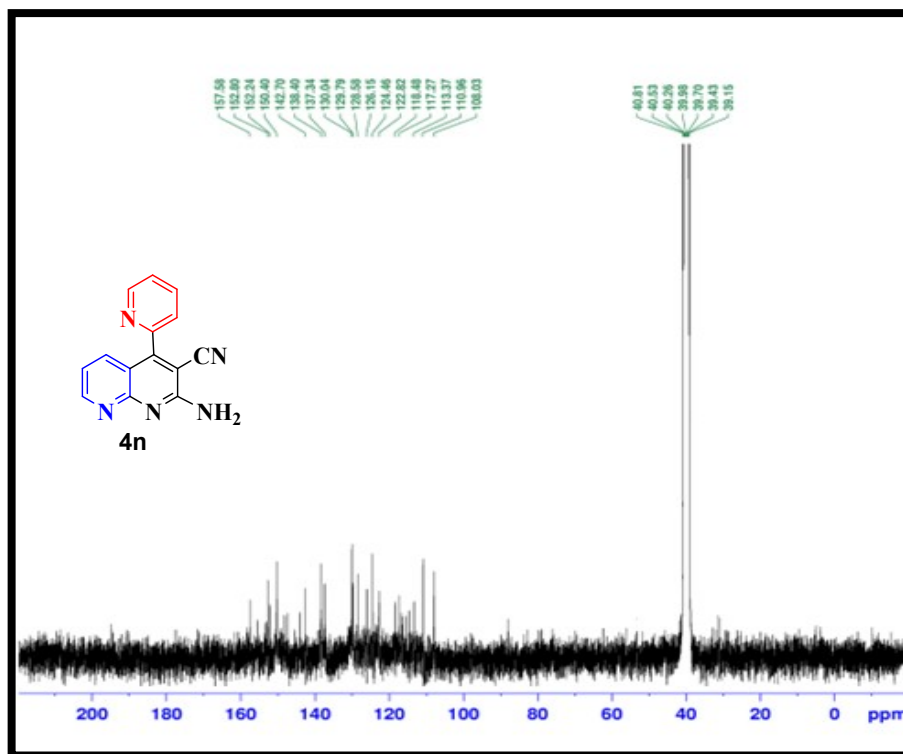

Supplement: d2ra05070f1.pdf [file d2ra05070f1.pdf]
